# Supplementary material
Source: PubMed Central journal article supplement (PMC490034)
Supplement: plntcell_tpc.020958_1.pdf [file plntcell_tpc.020958_1.pdf]

Table 1. *gar2* Partially or Completely Suppresses All Phenotypes of *rga-Δ17*

| Line                | Flowering time |            | Final height<br>(cm) | Rosette          | Branch<br>number | Fertility <sup>a</sup><br>(#seeds/siliques) |
|---------------------|----------------|------------|----------------------|------------------|------------------|---------------------------------------------|
|                     | Days           | Leaves     |                      | Diameter<br>(mm) |                  |                                             |
| WT                  | 14.9 ± 0.5     | 5.1 ± 0.1  | 15.1 ± 0.4           | 18.3 ± 0.5       | 3.0 ± 0.2        | 36.5 ± 1.2                                  |
| <i>rga-Δ17</i> hemi | 24.4 ± 0.7     | 13.5 ± 0.6 | 3.4 ± 0.2            | 19.6 ± 0.5       | 10.3 ± 0.6       | 15.1 ± 1.0                                  |
| <i>rga-Δ17</i> homo | 28.0 ± 1.5     | 16.1 ± 1.2 | n.d.                 | 9.0 ± 0.4        | n.d.             | n.d.                                        |
| <i>gar2 rga-Δ17</i> | 17.2 ± 0.4     | 8.5 ± 0.3  | 6.7 ± 0.2            | 20.1 ± 0.5       | 4.7 ± 0.4        | 39.2 ± 1.0                                  |

10 plants per line were characterized. Means ± SE are shown. <sup>a</sup> fertility is shown for fertile siliques, if any.

The *rga-Δ17* hemizygotes (hemi) produced many infertile siliques. The *rga-Δ17* homozygotes (homo) died shortly after flowering therefore final height, branch number and fertility were not determined (n.d.).
