# Supplementary material
Source: PubMed Central journal article supplement (PMC490034)
Supplement: plntcell_tpc.020958_2.pdf [file plntcell_tpc.020958_2.pdf]

Table 2. Genotyping, Sequencing and Cloning Primers

| Primer                                              | Sequence                                                                                                                               | Used for                                                                                    | Notes                                                                                                      |
|-----------------------------------------------------|----------------------------------------------------------------------------------------------------------------------------------------|---------------------------------------------------------------------------------------------|------------------------------------------------------------------------------------------------------------|
| 205<br>212                                          | 5' TCGCTTAGTAGTTAGTACTC<br>5' GGTGATTTTCACGGTGGTTG                                                                                     | <i>RGA</i><br>genotyping                                                                    | 948 bp PCR product                                                                                         |
| 205<br>253                                          | 5' TCGCTTAGTAGTTAGTACTC<br>5' CATAGACCATAGTATTCGTGA                                                                                    | <i>rga-24</i><br>genotyping                                                                 | 663 bp PCR product                                                                                         |
| 254<br>255                                          | 5' AGAAGCAATCCAGCAGA<br>5' GTGTACTCTCTTCTTACCTTC                                                                                       | <i>RGA</i><br>qRT-PCR                                                                       | 286 bp PCR product                                                                                         |
| 300<br>303                                          | 5' CTAGATCCGACATTGAAGGA<br>5' TCAAGCTGCTCGAGTTTCTG                                                                                     | <i>GAI</i> & <i>gai-1</i><br>genotyping                                                     | <i>GAI</i> (214 bp),<br><i>gai-1</i> (165 bp)                                                              |
| SLY1-5<br>SLY1-6                                    | 5' CCTAGAGGTCTCTCTGGTACA<br>TTC<br>5' GACAGAGTAGTAACCACCGG<br>GAAA                                                                     | amplify the <i>SLY1</i><br>locus from WT and<br><i>gar2</i> mutant for direct<br>sequencing | 1340 bp PCR product                                                                                        |
| SLY1-7                                              | 5' CAATCGATTCCACATGAAGCG<br>CAG                                                                                                        | <i>sly1-d</i> genomic DNA<br>sequencing                                                     |                                                                                                            |
| SLY1-8<br>SLY1-9                                    | 5' CAATATGGATCCACCACAA<br>5' AGATTTATCGTACCGCTGTAA                                                                                     | pSLY1-300<br>construction                                                                   | SLY1-8 introduces BamHI site                                                                               |
| SLY1-14<br>SLY1-15<br>SLY1-16<br>SLY1-17<br>SLY1-18 | 5' GTAAATCATGCTTACTAGAA<br>TC<br>5' ATCATGCCAACTGTTTGCG<br>5' TGAGTAGAGCTAGGAGCTA<br>5' TGAGTAGAGCTAGGAGCTA<br>5' GGTAAGTCAGATGTGATGTT | Sequencing<br>pSLY1-300                                                                     |                                                                                                            |
| SLY1-23<br>SLY1-24                                  | 5' CTCTTAGTGAAACTCATCTTCA<br>5' ATCGGCTGCGGGCAGAA                                                                                      | <i>SLY1</i> & <i>sly1-d</i><br>genotyping                                                   | <i>SLY1</i> (BsaAI: 173 bp, 20 bp)<br><i>sly1-d</i> (no BsaAI site)                                        |
| SLY1-31<br>SLY1-32                                  | 5' TTCCACATGAAGCGCAG<br>5' CCTAGCACGCGGATTG                                                                                            | <i>SLY1</i><br>qRT-PCR                                                                      | 361 bp PCR product                                                                                         |
| GAPcF2<br>GAPcR2                                    | 5' AGCTGCTACCTACGATG<br>5' CACACGGGAAGTGTAAAC                                                                                          | <i>GAPC</i><br>qRT-PCR                                                                      | 219 bp PCR product                                                                                         |
| SLY1-1<br>SLY1-2                                    | 5' ACTAGGATCCATGAAGCGCA<br>GTACTACCGAC<br>5' GTAGGAATTCTTATTTGGATT<br>CTGGAAGAGG                                                       | GST-SLY1 / <i>sly1-d</i>                                                                    | 5' and 3' primers for amplifying<br><i>SLY1</i> and <i>sly1-d</i> , cloning into<br>pGEX2-TK               |
| SLY1-3<br>SLY1-4                                    | 5' GTAGGAATTCATGAAGCGCA<br>GTACTACCGAC<br>5' ACTAGGATCCTTATTTGGATT<br>CTGGAAGAGG                                                       | DB-SLY1/ <i>sly1-d</i>                                                                      | For amplifying <i>SLY1</i> and <i>sly1-d</i> ,<br>cloning into pLexANLS                                    |
| SLY1-5ST                                            | 5' GTAGGAATTCGAGCTGATCT<br>GTACTCGTCAC                                                                                                 | DB-SLY1-CT1                                                                                 | For amplifying SLY-CT1 with<br>SLY1-4, cloning into pLexANLS                                               |
| SLY1-6ST                                            | 5' ACTAGGATCCGAGCATGCTTG<br>ATCCTAGGA                                                                                                  | DB- <i>sly1-10</i>                                                                          | For amplifying <i>sly1-10</i> with SLY1-3,<br>cloning into pLexANLS                                        |
| GAI100-1                                            | 5' ACGCGGATCCACATGAAGAG<br>AGATCATCATCATC                                                                                              | AD-GAI/ <i>gai-1</i> / GAI-<br>NT1/ GAI-NT2                                                 | 5' primer for amplifying GAI/ <i>gai-1</i> /<br>GAI-NT1/ GAI-NT2, cloning into<br>pACTII                   |
| GAI100-2                                            | 5' ACGCGAATTCCTAATTGGTGGA<br>GAGTTTCC                                                                                                  | AD-GAI/ <i>gai-1</i> / GAI-<br>CT1/ GAI-CT2/ GAI-<br>CT3/ GAI-CT4                           | 3' primer for amplifying GAI/ <i>gai-1</i> /<br>GAI-CT1/ GAI-CT2/ GAI-CT3/<br>GAI-CT4, cloning into pACTII |

|                      |                                                                                       |                                                    |                                                                                         |
|----------------------|---------------------------------------------------------------------------------------|----------------------------------------------------|-----------------------------------------------------------------------------------------|
| GAI100-3             | 5' ACGCGAATTCTAGACAACATG<br>CCGAGTTGACTC                                              | AD-GAI-NT1                                         | 3' primer for amplifying GAI-NT1<br>with GAI100-1, cloning into pACTII                  |
| GAI100-6             | 5' ACGCGAATTCTACCACTGACT<br>CAACGTTTCATG                                              | AD-GAI-NT2                                         | 3' primer for amplifying GAI-NT2<br>with GAI100-1, cloning into pACTII                  |
| GAI100-4             | 5' ACGCGGATCCCTCCGTCGTC<br>TAACGCCGAG                                                 | AD-GAI-CT1                                         | 5' primer for amplifying GAI-CT1<br>with GAI100-2, cloning into pACTII                  |
| GAI100-5             | 5' ACGCGGATCCACGAGTCAACT<br>CGGCATGTTGTC                                              | AD-GAI-CT2                                         | 5' primer for amplifying GAI-CT2<br>with GAI100-2, cloning into pACTII                  |
| GAI100-8             | 5' ACGCGGATCCTCTCTCCGTCG<br>CAGAGTCCA                                                 | AD-GAI-CT3                                         | 5' primer for amplifying GAI-CT3<br>with GAI100-2, cloning into pACTII                  |
| GAI100-9             | 5' ACGCGGATCCCACCGGCACC<br>GGATAATTTTC                                                | AD-GAI-CT4                                         | 5' primer for amplifying GAI-CT4<br>with GAI100-2, cloning into pACTII                  |
| 224<br>217           | 5' ACGCGGATCCGAATGAAGAG<br>AGATCATCACC<br>5' ATTAAGATCTTCAFTACGCCG<br>CCGTCGAGA       | AD-RGA &<br>AD-rga-Δ17                             | 5' and 3' primers for amplifying <i>RGA</i><br>and <i>rga-Δ17</i> , cloning into pACTII |
| SCL3-3<br>SCL3-4     | 5' ACGCGGATCCACATGGTGGCA<br>TGTTTCAAGAAG<br>5' ACGCGAATTCTCACTTCCTGCA<br>TCTCCAAGCT   | AD-SCL3                                            | 5' and 3' primers for amplifying<br><i>SCL3</i> , cloning into pACTII                   |
| NSFBx-1              | 5' GTAGGAATTCATGAAACAAA<br>ACCCTCTGAAG                                                | DB-NSFBx                                           | 5' primer for amplifying NSFBx<br>with NSFBx-2, cloning into<br>pLexANLS.               |
| NSFBx-2              | 5' ACTAGGATCCTTAGTCGACAA<br>GAAAACATTGG                                               | DB-NSFBx                                           | 5' primer for amplifying NSFBx<br>with NSFBx-1, cloning into<br>pLexANLS.               |
| CFP/YFP1<br>CFP/YFP2 | 5' GTACCGGTCCGCCACCATGGT<br>5' TAGCGGTACCAATGCCGCCTG<br>ACTTGACAGCT                   | 35S:CFP (pCFP1)                                    | PCR primers for amplifying CFP,<br>cloning into pRTL2                                   |
| SLY1-21<br>SLY1-20   | 5' AACACCATGGGCATGAAGCG<br>CAGTACTACCGAC<br>5' TAGCGGTACCTCCTGATTTGG<br>ATTCTGGAAGAGG | 35S:SLY1 (pSLY1-<br>401),<br>35S:sly1-d (pgar2-31) | PCR primers for amplifying SLY1<br>and sly1-d, cloning into pRTL2                       |
| CFP/YFP3<br>CFP/YFP4 | 5' ATGCGGTACCGCCACTATGGT<br>GAGCAAGG<br>5' TAGCGGTACCGCTTTACTTGT<br>ACAGCTC           | 35S:SLY1-CFP &<br>35S:(sly1-d)-CFP                 | PCR primers for amplifying CFP,<br>cloning into pSLY1-401 and pgar2-<br>31              |
